# Supplementary material for: Initial stage of carbonization of iron during hydrocarbons dissociation: a molecular dynamics study
Source: Royal Society of Chemistry journal article supplement (doi:10.1039/d2cp01991d), 2023-01-01
Supplement: d2cp01991d1.pdf [file d2cp01991d1.pdf]

Supplementary Material for  
**Initial stage of carbonization of iron during hydrocarbons  
dissociation: a molecular dynamics study**

Yubing Liu,<sup>a,b,c</sup> Xiaoze Yuan,<sup>b,c</sup> Kuan Lu,<sup>\*b,c</sup> Wei Chen,<sup>a</sup> Yu-Fei Song,<sup>\*a</sup> Yong Yang,<sup>b,c</sup>  
Yong-Wang Li,<sup>b,c</sup> and Xiao-Dong Wen<sup>\*b,c</sup>

<sup>a</sup>State Key Laboratory of Chemical Resource Engineering, School of Chemistry,  
Beijing University of Chemical Technology, Beijing 100029, P. R. China

<sup>b</sup>State Key Laboratory of Coal Conversion, Institute of Coal Chemistry, Chinese  
Academy of Sciences, Taiyuan, Shanxi 030001, P.R. China

<sup>c</sup>National Energy Center for Coal to Clean Fuels, Synfuels China Co., Ltd., Huairou  
District, Beijing 101400, P. R. China

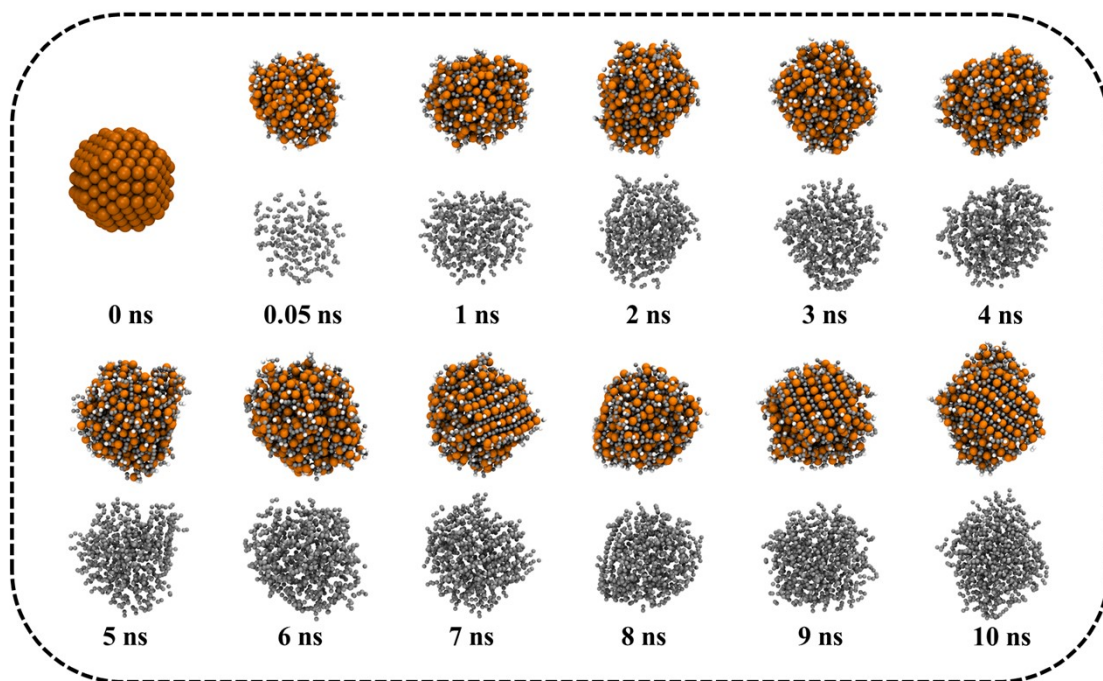

**Fig. S1** Morphological evolution of Fe nanoparticles during  $C_2H_6$  dissociation.

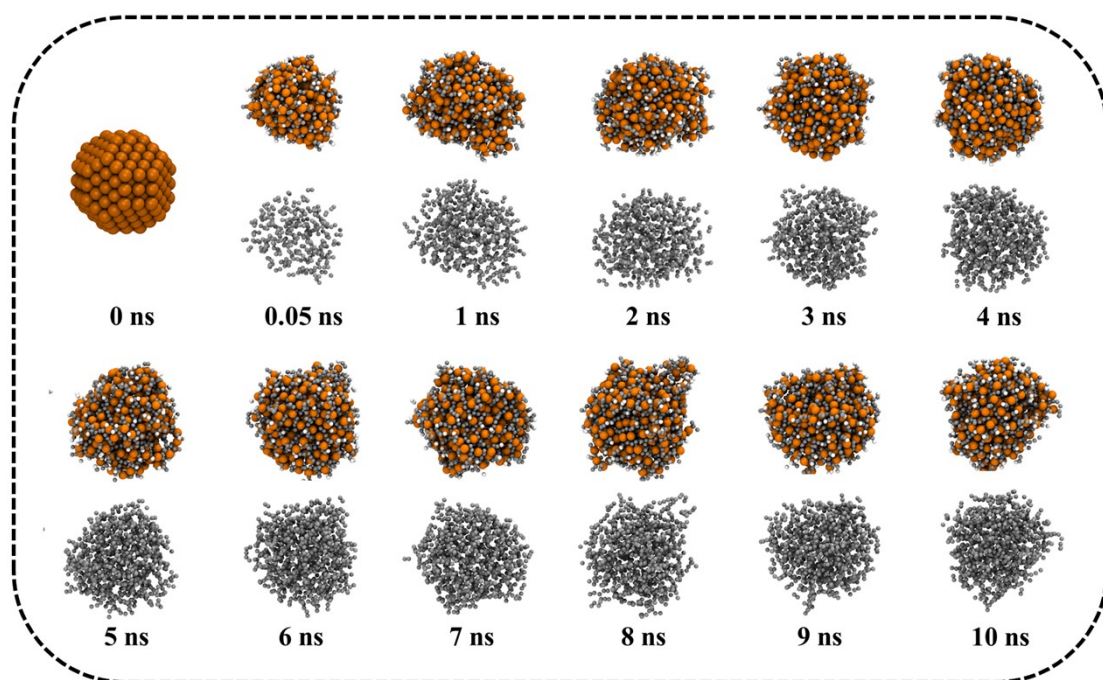

**Fig. S2** Morphological evolution of Fe nanoparticles during  $C_2H_4$  dissociation.

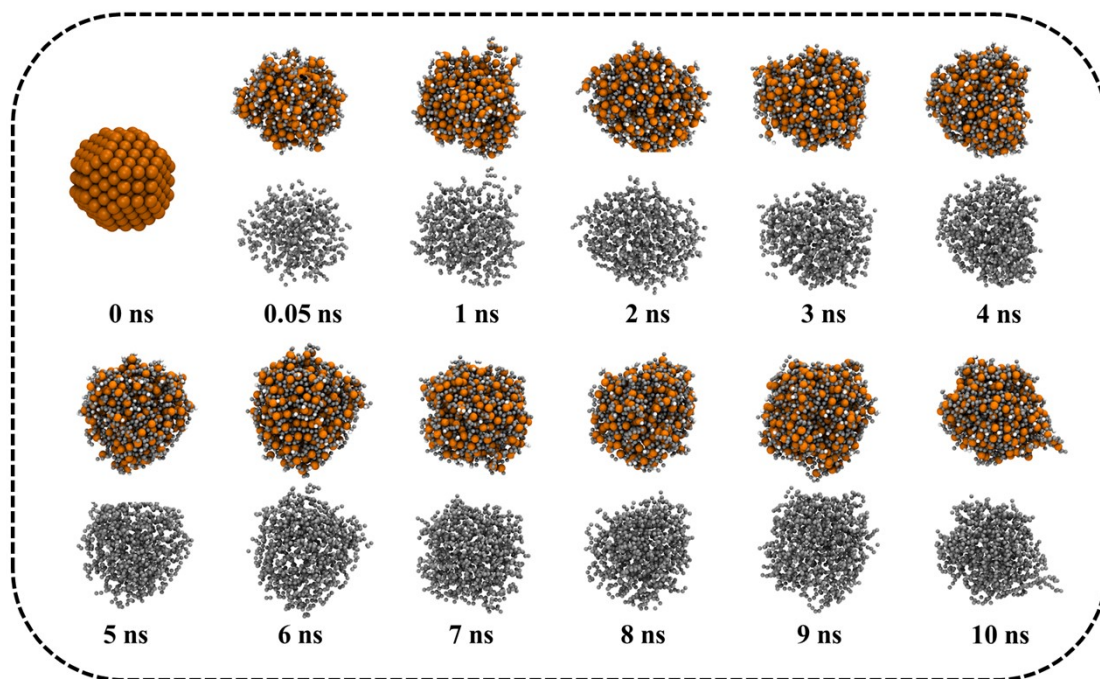

**Fig. S3** Morphological evolution of Fe nanoparticles during  $C_2H_2$  dissociation.

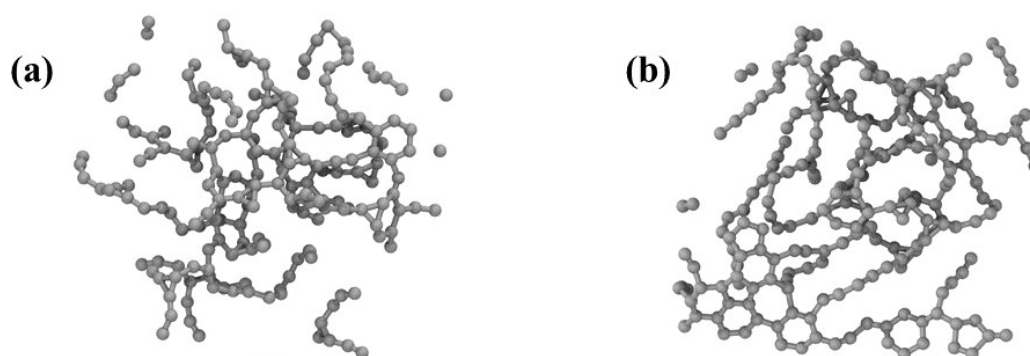

**Fig. S4** Local configuration of the carbon chain formed by (a)  $C_2H_4$  and (b)  $C_2H_2$  at 10 ns reaction time.

**Table S1.** Density of carbon atoms ( $g/cm^3$ ) in Fe nanoparticles after the reaction.

|         | $CH_4$ | $C_2H_6$ | $C_2H_4$ | $C_2H_2$ |
|---------|--------|----------|----------|----------|
| Density | 2.19   | 2.33     | 2.56     | 2.86     |
